# Supplementary material for: The Impact of Pre-Chemotherapy Body Composition and Immunonutritional Markers on Chemotherapy Adherence in Stage III Colorectal Cancer Patients
Source: MDPI journal article supplement (doi:10.3390/jcm12041423), 2023-02-10
Supplement: s1 [file s1]

**Table S1.** Causes of dose reduction or chemotherapy discontinuation divided according to toxicity grade in low RDI group

| Cause                         | Toxicity grades |              |              |              | Total patients (No) |
|-------------------------------|-----------------|--------------|--------------|--------------|---------------------|
|                               | Grade 1 (No)    | Grade 2 (No) | Grade 3 (No) | Grade 4 (No) |                     |
| Peripheral sensory neuropathy | 0               | 4            | 4            | 0            | 8                   |
| Decreased Neutrophil count    | 0               | 0            | 3            | 3            | 6                   |
| Nausea                        | 0               | 4            | 0            | 0            | 4                   |
| Fatigue                       | 0               | 1            | 1            | 0            | 2                   |
| Lung infection                | 0               | 0            | 0            | 1            | 1                   |
| Abdominal pain                | 0               | 0            | 1            | 0            | 1                   |
| <b>Total counts (No)</b>      | 0               | 9            | 8            | 4            | 22                  |

**Table S2.** Causes of dose reduction or chemotherapy discontinuation divided according to toxicity grade in high RDI group

| Cause                          | Toxicity grades |              |              |              | Total patients (No) |
|--------------------------------|-----------------|--------------|--------------|--------------|---------------------|
|                                | Grade 1 (No)    | Grade 2 (No) | Grade 3 (No) | Grade 4 (No) |                     |
| Peripheral sensory neuropathy  | 0               | 6            | 0            | 0            | 6                   |
| Peripheral motor neuropathy    | 0               | 1            | 0            | 0            | 1                   |
| Neutrophil count decreased     | 0               | 0            | 5            | 0            | 5                   |
| Nausea                         | 4               | 3            | 0            | 0            | 7                   |
| Fatigue                        | 0               | 2            | 0            | 0            | 2                   |
| Myalgia                        | 0               | 1            | 0            | 0            | 1                   |
| Abdominal pain                 | 0               | 1            | 0            | 0            | 1                   |
| Urticaria                      | 1               | 2            | 0            | 0            | 3                   |
| Dyspnea                        | 0               | 0            | 1            | 0            | 1                   |
| Generalized edema              | 1               | 1            | 0            | 0            | 2                   |
| Diarrhea                       | 0               | 1            | 0            | 0            | 1                   |
| Syncope                        | 0               | 0            | 1            | 0            | 1                   |
| Intestinal stoma site bleeding | 0               | 0            | 1            | 0            | 1                   |
| <b>Total counts (No)</b>       | 6               | 18           | 8            | 0            | 32                  |

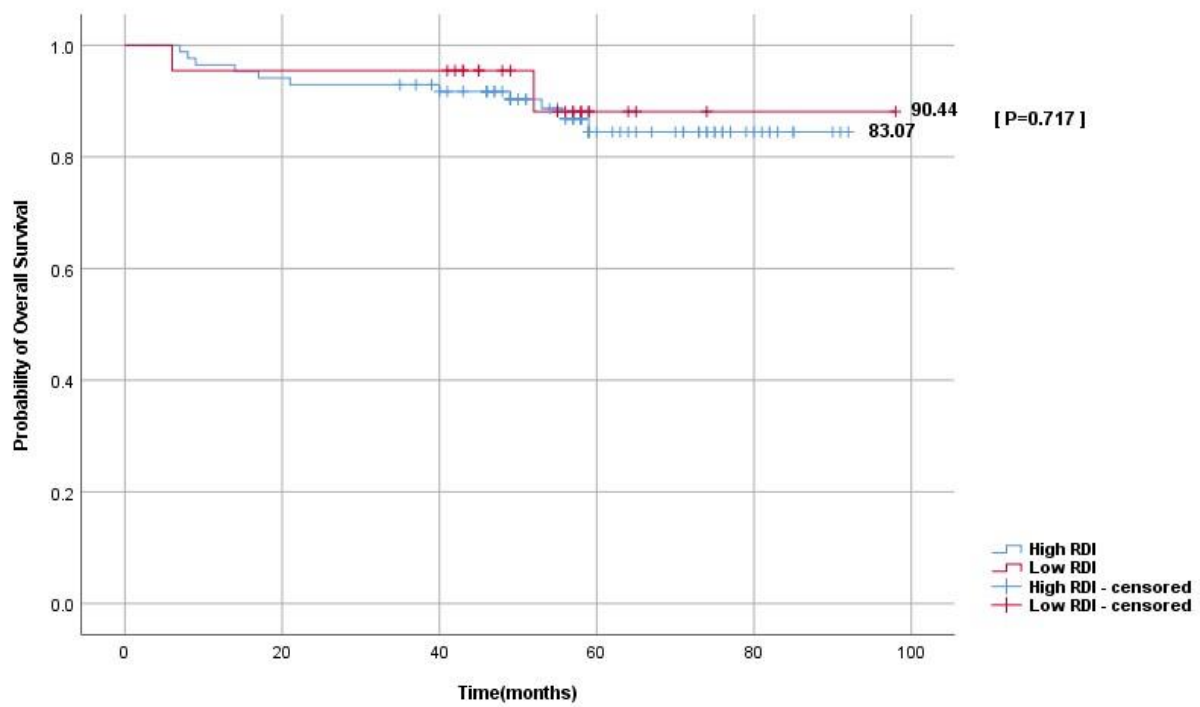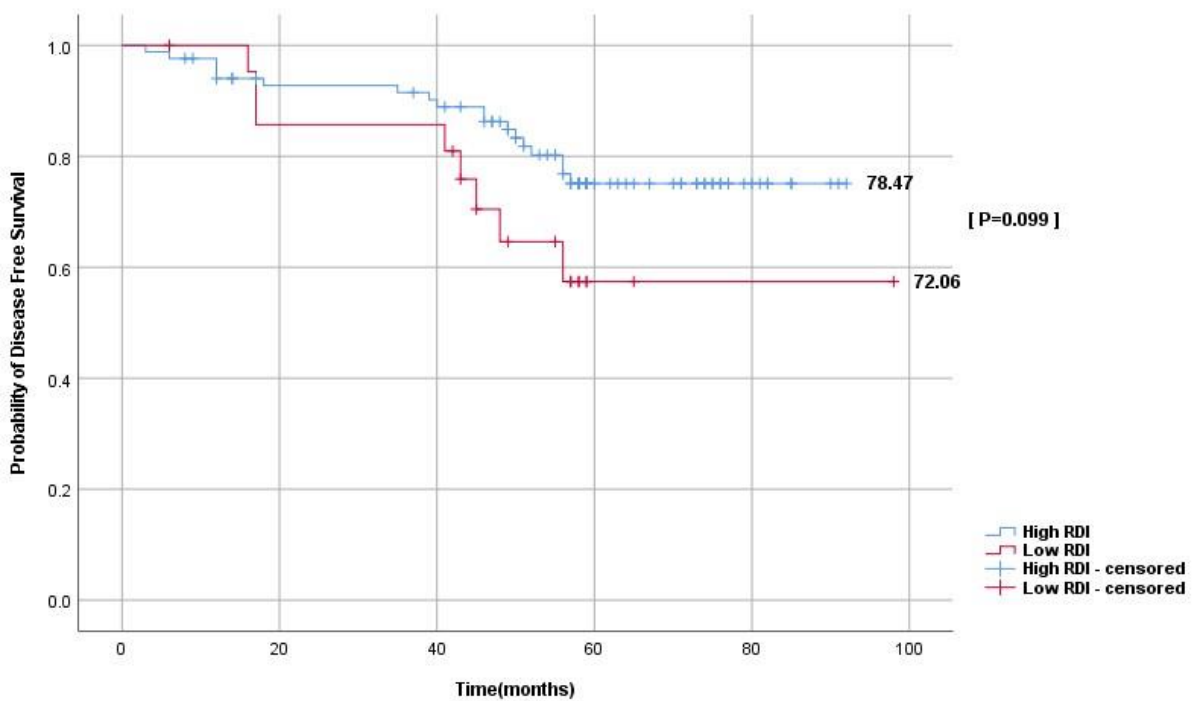

Figure S1. Five-year overall survival and disease free survival according to RDI
